# Supplementary material for: Access to Online Formative Assessments in Lower-Division Undergraduate Biology Courses: Investigating Barriers to Student Engagement
Source: Atypon-hosted journal article supplement (doi:10.1187/cbe.22-05-0098), 2022-10-20
Supplement: combinedsupmats.pdf [file combinedsupmats.pdf]

Supplemental Material  
*CBE—Life Sciences Education*  
Upchurch *et al.*

## SUPPLEMENTAL MATERIALS

### Access to online formative assessments in lower-division undergraduate biology courses:

#### Investigating barriers to student engagement

Allison M. Upchurch, Dana L. Kirkwood-Watts, Kathleen R. Brazeal, Lorey A. Wheeler,

Brian A. Couch, Gabrielle B. Johnson, Sarah K. Spier

*Supplemental table 1: Survey items with number of students who responded that the item is a barrier<sup>a</sup>*

| Category                | Item                                                                                                                         | n students who reported as a barrier | % of sample |
|-------------------------|------------------------------------------------------------------------------------------------------------------------------|--------------------------------------|-------------|
| Technical resources     | I have regular access to an appropriate device, such as a laptop or tablet, to complete the [FA] <sup>b</sup> .              | 41                                   | 3           |
|                         | I have regular access to the software programs needed to complete the [FA].                                                  | 50                                   | 4           |
|                         | I have a reliable internet connection where I live that enables me to complete the [FA].                                     | 83                                   | 7           |
|                         | I am comfortable using the electronic devices needed to complete the [FA].                                                   | 53                                   | 4           |
|                         | I find it easy to use the software needed to complete the [FA].                                                              | 61                                   | 5           |
|                         | I am able to access the internet and complete the [FA] in locations that are convenient to my daily schedule.                | 60                                   | 5           |
| Instructor organization | I can access the instructor or teaching assistants for help with the [FA].                                                   | 167                                  | 13          |
|                         | My main point of contact, such as the instructor or teaching assistant, is generally responsive to questions about the [FA]. | 240                                  | 19          |
|                         | I am comfortable contacting the instructor or teaching assistants with questions about the [FA].                             | 207                                  | 16          |
|                         | The due dates and times for the [FA] are clear and easy to find.                                                             | 77                                   | 6           |
|                         | The directions and expectations from the instructor about the [FA] are clear and the assignment is easy to locate online.    | 101                                  | 8           |
| Social interactions     | The instructor provides sufficient guidance in the use of the online delivery system used for the [FA].                      | 161                                  | 13          |
|                         | Other students in the course are a useful resource when I need help on the [FA].                                             | 557                                  | 44          |

|                      |                                                                                                                                                                                                                            |     |    |
|----------------------|----------------------------------------------------------------------------------------------------------------------------------------------------------------------------------------------------------------------------|-----|----|
|                      | I am comfortable reaching out to other students to discuss the [FA].                                                                                                                                                       | 492 | 39 |
|                      | My interactions with students in other parts of the course, such as the lecture or laboratory, make it easier for me to work with them on the [FA].                                                                        | 552 | 44 |
|                      | Working with other students on the [FA] has helped me form study groups for exams or other parts of the course                                                                                                             | 698 | 55 |
|                      | I have had support from people outside of the course that enables me to succeed on the [FA].                                                                                                                               | 638 | 51 |
|                      | There is sufficient interaction and communication among students with respect to completing the [FA].                                                                                                                      | 606 | 48 |
|                      | I have enough time to complete the [FA] while managing my other personal responsibilities, such as job commitments or taking care of others.                                                                               | 162 | 13 |
|                      | I have enough time in the week for other activities and responsibilities after completing the [FA].                                                                                                                        | 165 | 13 |
| Personal engagement  | I take responsibility for getting the most out of the [FA].                                                                                                                                                                | 153 | 13 |
|                      | I normally follow through on my plans for completing the [FA].                                                                                                                                                             | 72  | 6  |
|                      | I make it a priority to complete every [FA].                                                                                                                                                                               | 91  | 7  |
|                      | I find it easy to get started on the [FA].                                                                                                                                                                                 | 233 | 18 |
|                      | I avoid multitasking when I am completing the [FA].                                                                                                                                                                        | 367 | 29 |
|                      | I can focus on the [FA] even if I receive notifications on my electronic devices.                                                                                                                                          | 303 | 24 |
| Learning environment | I can focus on the [FA] despite the draw of other online activities, such as social media or online games.                                                                                                                 | 255 | 20 |
|                      | I put my other electronic devices on silent while I am completing the [FA].                                                                                                                                                | 620 | 49 |
|                      | I can complete the [FA] in locations convenient to my daily schedule without being interrupted by others.                                                                                                                  | 150 | 12 |
|                      | The television and other videos are off when I am completing the [FA].                                                                                                                                                     | 328 | 26 |
| Open-ended prompts   | You responded that you [Likert response] with the following statement: [Item text]. In 1-2 sentences, please explain why you [Likert response] with the statement.                                                         |     |    |
|                      | You responded that you [Likert response] with the following statement: [Item text]. Is there something your instructor or institution could do to support you in regard to this statement? Please explain in 1-2 sentences |     |    |
|                      |                                                                                                                                                                                                                            |     |    |
|                      |                                                                                                                                                                                                                            |     |    |

<sup>a</sup>An item was considered a barrier if students selected “strongly disagree,” “disagree,” “somewhat disagree,” or “neither agree nor disagree” for the item.

<sup>b</sup>The portion of each question in brackets was replaced with the name of the activity used in a given course in order to use labels that would be familiar to students (e.g., “homework quiz”).

Supplemental table 2: Final survey participant demographic information by institution type

|                         | 2-year                |                           | 4-year                |                           |
|-------------------------|-----------------------|---------------------------|-----------------------|---------------------------|
|                         | <i>n</i> <sup>a</sup> | % of institution's sample | <i>n</i> <sup>a</sup> | % of institution's sample |
| Gender <sup>b</sup>     |                       |                           |                       |                           |
| Female                  | 196                   | 76                        | 710                   | 71                        |
| Male                    | 53                    | 20                        | 277                   | 28                        |
| Self-describe           | <4                    | <1.6                      | <4                    | <0.4                      |
| Race/ethnicity          |                       |                           |                       |                           |
| Non-URM                 | 191                   | 74                        | 852                   | 85                        |
| URM <sup>c</sup>        | 48                    | 19                        | 119                   | 12                        |
| Self-describe           | 6                     | 2                         | 5                     | 0.5                       |
| Class rank              |                       |                           |                       |                           |
| First-year              | 76                    | 29                        | 481                   | 48                        |
| Sophomore               | 78                    | 30                        | 236                   | 24                        |
| Junior                  | 39                    | 15                        | 172                   | 17                        |
| Senior                  | 12                    | 4.6                       | 89                    | 9                         |
| Postbaccalaureate       | 27                    | 10                        | 7                     | 0.7                       |
| Graduate student        | 7                     | 2.7                       | <4                    | <0.4                      |
| Other                   | 8                     | 3.1                       | 10                    | 1                         |
| First-generation status |                       |                           |                       |                           |
| Not first-generation    | 86                    | 33                        | 638                   | 64                        |
| First-generation        | 163                   | 63                        | 342                   | 34                        |
| Language spoken at home |                       |                           |                       |                           |
| English                 | 193                   | 75                        | 911                   | 91                        |
| Other                   | 60                    | 23                        | 83                    | 8.3                       |
| Career plan             |                       |                           |                       |                           |
| Life sciences           | 226                   | 87                        | 764                   | 76                        |
| Other                   | 69                    | 27                        | 183                   | 18                        |

<sup>a</sup>Numbers do not add to full sample size because some students left the given item blank. Exact counts  $0 < n < 4$  not specified for privacy reasons.

<sup>b</sup>Those who self-described their gender all identified as non-binary.

<sup>c</sup>Underrepresented racial/ethnic groups included participants who self-identified as African American/ Black, Hispanic/Latinx, Native American/Alaska Native, or Native Hawaiian/Pacific Islander.

Supplemental table 3: Open-ended prompt 1 codebook

| You responded that you [Likert response] with the following statement: [Item text].<br>In 1-2 sentences, please explain why you [Likert response] with the statement. |                                                                                                                                                                                                                                                                                              |                                                                                                                                                                                                      |                                                                                                                                                                                                                                                                   |
|-----------------------------------------------------------------------------------------------------------------------------------------------------------------------|----------------------------------------------------------------------------------------------------------------------------------------------------------------------------------------------------------------------------------------------------------------------------------------------|------------------------------------------------------------------------------------------------------------------------------------------------------------------------------------------------------|-------------------------------------------------------------------------------------------------------------------------------------------------------------------------------------------------------------------------------------------------------------------|
| Code                                                                                                                                                                  | Description                                                                                                                                                                                                                                                                                  | Examples                                                                                                                                                                                             |                                                                                                                                                                                                                                                                   |
|                                                                                                                                                                       |                                                                                                                                                                                                                                                                                              | Item                                                                                                                                                                                                 | Student quote                                                                                                                                                                                                                                                     |
| Intended interpretation                                                                                                                                               | <ul style="list-style-type: none"> <li>• Student response indicates a <b>reasonable interpretation</b> of the survey item.</li> <li>• It is clear that the student understands what the item is asking.</li> <li>• There is an apparent connection between the item and response.</li> </ul> | <p>I have regular access to an appropriate device, such as a laptop or tablet, to complete the FA.</p> <p>I can focus on the FA even if I receive notifications on my electronic devices.</p>        | <p>“I have a personal laptop and have access to the school's computers if needed.”</p> <p>“I sometimes get distracted with my phone while I work on these assignments”</p>                                                                                        |
| Ambiguous response                                                                                                                                                    | <ul style="list-style-type: none"> <li>• Student response seems <b>somewhat related</b> to the item.</li> <li>• There is a connection between the item and student response, but the exact connection is unclear.</li> </ul>                                                                 | <p>The instructor provides sufficient guidance in the use of the online delivery system used for the FA.</p> <p>I normally follow through on my plans for completing the FA.</p>                     | <p>“[Instructor] was the best science professor I've ever had.”</p> <p>“I need a good grade.”</p>                                                                                                                                                                 |
| Unintended interpretation                                                                                                                                             | <ul style="list-style-type: none"> <li>• Student response has evidence of a <b>misinterpretation</b> of the survey item.</li> <li>• The student has attempted to address the item, but their response indicated that they read the question in a different way than intended.</li> </ul>     | <p>The due dates and times for the FA are clear and easy to find.</p> <p>The directions and expectations from the instructor about the FA are clear and the assignment is easy to locate online.</p> | <p>“I though the topics of [FA] would match up with the weeks topics but it didn't always”</p> <p>“My instructor records her zoom sessions. In her zoom sessions, not only does she briefly go over the lecture slides, but she also answers [FA] questions.”</p> |
| Off-topic response                                                                                                                                                    | <ul style="list-style-type: none"> <li>• Student response is <b>entirely off-topic</b> and not at all relevant to the item (e.g., “I had a sandwich for lunch”).</li> <li>• Student clearly does not attempt to understand and answer question.</li> </ul>                                   | <p>I can access the instructor or teaching assistants for help with the FA.</p>                                                                                                                      | <p>“Why did we have a short time for quizzes”</p>                                                                                                                                                                                                                 |
| No response provided                                                                                                                                                  | <ul style="list-style-type: none"> <li>• Student responds with “N/A”</li> <li>• Response is left <b>blank</b></li> </ul>                                                                                                                                                                     |                                                                                                                                                                                                      |                                                                                                                                                                                                                                                                   |

Supplemental table 4: Open-ended prompt 2 codebook

| “You responded that you [Likert response] with the following statement: [Item text]. Is there something your instructor or institution could do to support you in regard to this statement? Please explain in 1-2 sentences.” |                                                                                                                                                                                   |                                                                                                                              |                                                                                                                                                                                                      |
|-------------------------------------------------------------------------------------------------------------------------------------------------------------------------------------------------------------------------------|-----------------------------------------------------------------------------------------------------------------------------------------------------------------------------------|------------------------------------------------------------------------------------------------------------------------------|------------------------------------------------------------------------------------------------------------------------------------------------------------------------------------------------------|
| Code                                                                                                                                                                                                                          | Description                                                                                                                                                                       | Examples                                                                                                                     |                                                                                                                                                                                                      |
|                                                                                                                                                                                                                               |                                                                                                                                                                                   | Item                                                                                                                         | Student quote                                                                                                                                                                                        |
| Something to improve/change                                                                                                                                                                                                   | <ul style="list-style-type: none"> <li>Student response identifies something that could be <b>changed or improved upon</b></li> </ul>                                             | There is sufficient interaction and communication among students with respect to completing the [FA].                        | “I think it would be helpful for the instructor to encourage collaboration on these assignments is her goal is for us to work together on them.”                                                     |
| Something that should continue                                                                                                                                                                                                | <ul style="list-style-type: none"> <li>Student response identifies <b>something already occurring</b> that should continue</li> </ul>                                             | I have regular access to the software programs needed to complete the [FA].                                                  | “Continue providing assistance to both instructors and students with software/learning programs to allow for cohesive transition to in person learning whilst still incorporating online resources.” |
| No specific suggestions/nothing can be done                                                                                                                                                                                   | <ul style="list-style-type: none"> <li>Student response <b>contains no specific suggestions</b></li> <li>Student responds that <b>nothing can be done</b> to help them</li> </ul> | The instructor provides sufficient guidance in the use of the online delivery system used for the [FA].                      | “There is nothing different that my instructor needs to do.”                                                                                                                                         |
| Unrelated/random response                                                                                                                                                                                                     | <ul style="list-style-type: none"> <li>Student response is <b>entirely off-topic</b> and not at all relevant to the item (e.g., “I had a sandwich for lunch”).</li> </ul>         | My main point of contact, such as the instructor or teaching assistant, is generally responsive to questions about the [FA]. | “Thank you for this semester”                                                                                                                                                                        |
| Left blank or answered “N/A”                                                                                                                                                                                                  | <ul style="list-style-type: none"> <li>Student responds with “N/A”</li> <li>Response is left <b>blank</b></li> </ul>                                                              |                                                                                                                              |                                                                                                                                                                                                      |

Supplemental table 5: Mixed-effects model to investigate differences in barrier category mean scores.  $R^2 = 0.48$ .

| Fixed effect tests                |           |               |                   |                   |
|-----------------------------------|-----------|---------------|-------------------|-------------------|
|                                   | <i>df</i> | F ratio       | <i>p</i>          |                   |
| Barrier category                  | 4, 4940   | 656.22        | <b>&lt;0.0001</b> |                   |
| REML variance component estimates |           |               |                   |                   |
| Random effect                     | Var ratio | Var component | SE                | Wald p-value      |
| Instructor                        | 0.034     | 0.032         | 0.016             | 0.051             |
| Student[Instructor]               | 0.257     | 0.241         | 0.018             | <b>&lt;0.0001</b> |
| Residual                          |           | 0.938         | 0.019             |                   |
| Total                             |           | 1.211         | 0.028             |                   |

Supplemental table 6: Mixed-effects models<sup>a</sup> to determine relationships between demographics and barrier scores, separated by institution type. Predictors were included in separate models for each barrier category. Significant relationships (p<0.05) are in bold.

| Independent variables                  | Dependent variables      |                         |                     |                     |                      |                     |                         |                     |                     |                      |
|----------------------------------------|--------------------------|-------------------------|---------------------|---------------------|----------------------|---------------------|-------------------------|---------------------|---------------------|----------------------|
|                                        | 2-year                   |                         |                     |                     |                      | 4-year              |                         |                     |                     |                      |
|                                        | Technical resources      | Instructor organization | Social interactions | Personal engagement | Learning environment | Technical resources | Instructor organization | Social interactions | Personal engagement | Learning environment |
| <b>Demographics<sup>b</sup></b>        | Estimate±SE <sup>c</sup> |                         |                     |                     |                      |                     |                         |                     |                     |                      |
| Gender<br>(Reference: Female)          |                          |                         |                     |                     |                      |                     |                         |                     |                     |                      |
| Male                                   | -0.08±0.16               | 0.04±0.12               | 0.02±0.24           | -0.13±0.18          | -0.30±0.19           | -0.12±0.06          | -0.01±0.06              | 0.01±0.11           | -0.11±0.07          | 0.10±0.08            |
| Self-describe <sup>d</sup>             |                          |                         |                     |                     |                      | -0.43±0.87          | -1.04±0.75              | -0.29±1.44          | -1.21±0.90          | -1.62±1.12           |
| Race/ethnicity<br>(Reference: Non-URM) |                          |                         |                     |                     |                      |                     |                         |                     |                     |                      |
| URM <sup>e</sup>                       | -0.04±0.17               | 0.22±0.13               | -0.14±0.25          | 0.10±0.18           | <b>0.48±0.20</b>     | 0.04±0.09           | 0.14±0.08               | -0.28±0.15          | <b>0.20±0.10</b>    | 0.12±0.12            |
| Self-describe                          | -0.17±0.49               | -0.30±0.36              | 0.05±0.70           | -0.46±0.52          | 0.36±0.57            | 0.19±0.39           | 0.11±0.33               | 0.18±0.64           | 0.65±0.40           | 0.51±0.50            |
| Class rank<br>(Reference: First-year)  |                          |                         |                     |                     |                      |                     |                         |                     |                     |                      |
| Sophomore                              | 0.27±0.36                | 0.10±0.26               | 0.69±0.52           | 0.27±0.39           | 0.67±0.42            | -0.48±0.28          | -0.02±0.24              | <b>0.97±0.46</b>    | 0.08±0.29           | -0.16±0.36           |
| Junior                                 | 0.10±0.36                | -0.10±0.26              | 0.42±0.52           | 0.08±0.38           | 0.07±0.42            | -0.34±0.28          | -0.04±0.24              | 0.65±0.46           | 0.05±0.29           | -0.20±0.36           |
| Senior                                 | 0.18±0.38                | 0.22±0.27               | 0.86±0.54           | 0.22±0.40           | 0.47±0.44            | -0.41±0.28          | 0.06±0.24               | 0.74±0.47           | -0.07±0.29          | -0.12±0.37           |



|                                                                    |                   |                   |            |                   |            |                   |                   |            |                   |            |
|--------------------------------------------------------------------|-------------------|-------------------|------------|-------------------|------------|-------------------|-------------------|------------|-------------------|------------|
| Postbaccalaur<br>eate                                              | -0.21±0.44        | -0.01±0.32        | 0.27±0.63  | -0.50±0.47        | -0.40±0.51 | -0.34±0.29        | -0.09±0.25        | 0.59±0.49  | 0.02±0.31         | -0.12±0.38 |
| Graduate<br>student                                                | 0.25±0.38         | 0.13±0.28         | -0.03±0.55 | 0.17±0.41         | 0.72±0.44  | -0.12±0.45        | 0.02±0.39         | 0.25±0.74  | -0.23±0.46        | 0.18±0.57  |
| Other                                                              | 0.56±0.52         | -0.23±0.38        | -0.01±0.75 | 0.76±0.55         | 0.25±0.60  | -0.87±0.91        | 0.38±0.78         | -0.94±1.50 | -0.04±0.94        | -0.75±1.17 |
| First-generation<br>status<br>(Reference: Non<br>first-generation) |                   |                   |            |                   |            |                   |                   |            |                   |            |
| First-<br>generation                                               | 0.02±0.15         | -0.09±0.11        | 0.05±0.22  | -0.08±0.16        | 0.06±0.17  | -0.06±0.06        | 0.03±0.05         | 0.02±0.10  | <b>-0.18±0.06</b> | 0.08±0.08  |
| Language<br>(Reference:<br>English)                                |                   |                   |            |                   |            |                   |                   |            |                   |            |
| Non-English                                                        | <b>-0.72±0.17</b> | <b>-0.25±0.12</b> | 0.40±0.24  | <b>-0.40±0.18</b> | -0.06±0.19 | <b>-0.34±0.11</b> | <b>-0.29±0.10</b> | 0.07±0.19  | <b>-0.25±0.12</b> | -0.16±0.14 |
| Career<br>(Reference: Life<br>sciences)                            |                   |                   |            |                   |            |                   |                   |            |                   |            |
| Non-Life<br>sciences                                               | -0.12±0.15        | -0.11±0.12        | -0.05±0.23 | -0.10±0.16        | 0.20±0.18  | -0.10±0.07        | 0.00±0.06         | 0.01±0.11  | <b>-0.14±0.07</b> | -0.11±0.09 |

<sup>a</sup>Barrier category score ~ gender + race/ethnicity + class rank + first-generation status + language + career + institution type. Instructor=random effect

<sup>b</sup>Reference categories were selected based on the group with the most students.

<sup>c</sup>Estimates indicate the effect based on being a member of the focal group in comparison to the reference group.

<sup>d</sup>Those who self-described their gender all identified as non-binary; there were not enough individuals in this group at the 2-year institution for statistical analysis

<sup>e</sup>Underrepresented racial/ethnic groups included participants who self-identified as African American/ Black, Hispanic/Latinx, Native American/Alaska Native, or Native Hawaiian/Pacific Islander.

Supplemental table 7: Mixed-effects model investigating the relationship between demographics and course performance, accounting for instructor. Significant relationships ( $p < 0.05$ ) are in bold.

| Independent variables                                     | Estimates of fixed effects         |           |          |                 |
|-----------------------------------------------------------|------------------------------------|-----------|----------|-----------------|
|                                                           | Estimate $\pm$ SE                  | <i>df</i> | <i>t</i> | <i>p</i> -value |
| <b>Demographics</b>                                       |                                    |           |          |                 |
| Gender (Reference: Female)                                |                                    |           |          |                 |
| Male                                                      | -0.608 $\pm$ 0.681                 | 975.846   | -0.893   | 0.372           |
| Self-describe                                             | 9.305 $\pm$ 9.228                  | 972.176   | 1.008    | 0.314           |
| Race/ethnicity (Reference: Non-URM)                       |                                    |           |          |                 |
| URM                                                       | <b>-2.373<math>\pm</math>0.912</b> | 976.721   | -2.601   | <b>0.009</b>    |
| Self-describe                                             | -3.981 $\pm$ 3.306                 | 976.707   | -1.204   | 0.229           |
| Class rank (Reference: First-year)                        |                                    |           |          |                 |
| Sophomore                                                 | -3.292 $\pm$ 2.387                 | 975.310   | -1.379   | 0.168           |
| Junior                                                    | -2.758 $\pm$ 2.400                 | 974.456   | -1.149   | 0.251           |
| Senior                                                    | -2.374 $\pm$ 2.449                 | 975.842   | -0.969   | 0.333           |
| Postbaccalaureate                                         | -2.016 $\pm$ 2.571                 | 976.352   | -0.784   | 0.433           |
| Graduate student                                          | 2.335 $\pm$ 2.890                  | 976.238   | 0.808    | 0.419           |
| Other                                                     | 1.084 $\pm$ 4.467                  | 977.291   | 0.243    | 0.808           |
| First-generation status (Reference: non first-generation) |                                    |           |          |                 |
| First-generation                                          | -3.666 $\pm$ 0.651                 | 978.753   | 0.746    | 0.456           |
| Language (Reference: English)                             |                                    |           |          |                 |
| Non-English                                               | <b>0.763<math>\pm</math>1.023</b>  | 979.387   | -6.309   | <b>0.000</b>    |
| Career (Reference: Life sciences)                         |                                    |           |          |                 |
| Non-Life sciences                                         | <b>-4.539<math>\pm</math>0.719</b> | 979.387   | -6.309   | <b>0.000</b>    |
| Institution type (Reference: 4-year)                      |                                    |           |          |                 |
| 2-year                                                    | -4.384 $\pm$ 2.614                 | 9.921     | -1.677   | 0.125           |

Course performance  $\sim$  gender + race/ethnicity + class rank + first-generation status + language + career + institution type. Instructor=random effect

*Supplemental table 8: Mixed-effects model investigating the relationship between **technical resources** and course performance, accounting for demographics and instructor. Significant relationships ( $p < 0.05$ ) are in bold.*

| Independent variables                                     | Estimates of fixed effects |         |        |              |
|-----------------------------------------------------------|----------------------------|---------|--------|--------------|
|                                                           | Estimate±SE                | df      | t      | p-value      |
| <b>Demographics</b>                                       |                            |         |        |              |
| Gender (Reference: Female)                                |                            |         |        |              |
| Male                                                      | -0.523±0.677               | 974.694 | -0.772 | 0.440        |
| Self-describe                                             | 9.801±9.170                | 971.130 | 1.069  | 0.285        |
| Race/ethnicity (Reference: Non-URM)                       |                            |         |        |              |
| URM                                                       | <b>-2.361±0.907</b>        | 975.614 | -2.604 | <b>0.009</b> |
| Self-describe                                             | -3.996±3.285               | 975.601 | -1.216 | 0.224        |
| Class rank (Reference: First-year)                        |                            |         |        |              |
| Sophomore                                                 | -3.145±2.372               | 974.167 | -1.326 | 0.185        |
| Junior                                                    | -2.653±2.385               | 973.351 | -1.113 | 0.266        |
| Senior                                                    | -2.114±2.434               | 974.751 | -0.868 | 0.385        |
| Postbaccalaureate                                         | -1.689±2.556               | 975.254 | -0.661 | 0.509        |
| Graduate student                                          | 2.268±2.872                | 975.130 | 0.790  | 0.430        |
| Other                                                     | 0.831±4.440                | 976.150 | 0.187  | 0.852        |
| First-generation status (Reference: non first-generation) |                            |         |        |              |
| First-generation                                          | -3.683±0.646               | 977.228 | 1.275  | 0.203        |
| Language (Reference: English)                             |                            |         |        |              |
| Non-English                                               | <b>1.310±1.028</b>         | 978.568 | -6.174 | <b>0.000</b> |
| Career (Reference: Life sciences)                         |                            |         |        |              |
| Non-Life sciences                                         | <b>-4.419±0.716</b>        | 978.568 | -6.174 | <b>0.000</b> |
| Institution type (Reference: 4-year)                      |                            |         |        |              |
| 2-year                                                    | -4.254±2.638               | 9.880   | -1.612 | 0.138        |
| <b>Barrier category</b>                                   |                            |         |        |              |
| Technical resources                                       | <b>1.312±0.358</b>         | 972.310 | 3.662  | <b>0.000</b> |

Course performance ~ gender + race/ethnicity + class rank + first-generation status + language + career + institution type + technical resources. Instructor=random effect

Supplemental table 9: Mixed-effects model investigating the relationship between **instructor organization** and course performance, accounting for demographics and instructor. Significant relationships ( $p < 0.05$ ) are in bold.

| Independent variables                                     | Estimates of fixed effects |         |        |              |
|-----------------------------------------------------------|----------------------------|---------|--------|--------------|
|                                                           | Estimate±SE                | df      | t      | p-value      |
| <b>Demographics</b>                                       |                            |         |        |              |
| Gender (Reference: Female)                                |                            |         |        |              |
| Male                                                      | -0.597±0.680               | 974.870 | -0.879 | 0.380        |
| Self-describe                                             | 10.253±9.218               | 971.206 | 1.112  | 0.266        |
| Race/ethnicity (Reference: Non-URM)                       |                            |         |        |              |
| URM                                                       | <b>-2.444±0.911</b>        | 975.700 | -2.683 | <b>0.007</b> |
| Self-describe                                             | -3.884±3.299               | 975.714 | -1.177 | 0.239        |
| Class rank (Reference: First-year)                        |                            |         |        |              |
| Sophomore                                                 | -3.367±2.382               | 974.440 | -1.413 | 0.158        |
| Junior                                                    | -2.755±2.395               | 973.492 | -1.150 | 0.250        |
| Senior                                                    | -2.477±2.444               | 974.904 | -1.013 | 0.311        |
| Postbaccalaureate                                         | -1.966±2.565               | 975.406 | -0.766 | 0.444        |
| Graduate student                                          | 2.212±2.885                | 975.168 | 0.767  | 0.443        |
| Other                                                     | 1.162±4.458                | 976.345 | 0.261  | 0.794        |
| First-generation status (Reference: non first-generation) |                            |         |        |              |
| First-generation                                          | -3.706±0.649               | 977.721 | 0.953  | 0.341        |
| Language (Reference: English)                             |                            |         |        |              |
| Non-English                                               | <b>0.977±1.025</b>         | 978.333 | -6.329 | <b>0.000</b> |
| Career (Reference: Life sciences)                         |                            |         |        |              |
| Non-Life sciences                                         | <b>-4.543±0.718</b>        | 978.333 | -6.329 | <b>0.000</b> |
| Institution type (Reference: 4-year)                      |                            |         |        |              |
| 2-year                                                    | -4.733±2.601               | 10.008  | -1.819 | 0.099        |
| <b>Barrier category</b>                                   |                            |         |        |              |
| Instructor organization                                   | <b>0.937±0.411</b>         | 977.973 | 2.282  | <b>0.023</b> |

Course performance ~ gender + race/ethnicity + class rank + first-generation status + language + career + institution type + instructor organization. Instructor=random effect

*Supplemental table 10: Mixed-effects model investigating the relationship between **social interactions** and course performance, accounting for demographics and instructor. Significant relationships ( $p < 0.05$ ) are in bold.*

| Independent variables                                     | Estimates of fixed effects |         |        |              |
|-----------------------------------------------------------|----------------------------|---------|--------|--------------|
|                                                           | Estimate±SE                | df      | t      | p-value      |
| <b>Demographics</b>                                       |                            |         |        |              |
| Gender (Reference: Female)                                |                            |         |        |              |
| Male                                                      | -0.572±0.681               | 975.026 | -0.839 | 0.402        |
| Self-describe                                             | 9.249±9.222                | 971.130 | 1.003  | 0.316        |
| Race/ethnicity (Reference: Non-URM)                       |                            |         |        |              |
| URM                                                       | <b>-2.472±0.914</b>        | 975.923 | -2.703 | <b>0.007</b> |
| Self-describe                                             | -3.988±3.304               | 975.557 | -1.207 | 0.228        |
| Class rank (Reference: First-year)                        |                            |         |        |              |
| Sophomore                                                 | -3.024±2.393               | 974.112 | -1.264 | 0.207        |
| Junior                                                    | -2.600±2.401               | 973.374 | -1.083 | 0.279        |
| Senior                                                    | -2.172±2.451               | 974.790 | -0.886 | 0.376        |
| Postbaccalaureate                                         | -1.880±2.571               | 975.164 | -0.731 | 0.465        |
| Graduate student                                          | 2.339±2.888                | 975.077 | 0.810  | 0.418        |
| Other                                                     | 0.968±4.465                | 976.122 | 0.217  | 0.828        |
| First-generation status (Reference: non first-generation) |                            |         |        |              |
| First-generation                                          | -3.645±0.650               | 977.670 | 0.787  | 0.432        |
| Language (Reference: English)                             |                            |         |        |              |
| Non-English                                               | <b>0.805±1.023</b>         | 978.582 | -6.336 | <b>0.000</b> |
| Career (Reference: Life sciences)                         |                            |         |        |              |
| Non-Life sciences                                         | <b>-4.557±0.719</b>        | 978.582 | -6.336 | <b>0.000</b> |
| Institution type (Reference: 4-year)                      |                            |         |        |              |
| 2-year                                                    | -4.373±2.674               | 9.870   | -1.635 | 0.133        |
| <b>Barrier category</b>                                   |                            |         |        |              |
| Social interactions                                       | -0.295±0.212               | 978.565 | -1.393 | 0.164        |

Course performance ~ gender + race/ethnicity + class rank + first-generation status + language + career + institution type + social interactions. Instructor=random effect

*Supplemental table 11: Mixed-effects model investigating the relationship between **personal engagement** and course performance, accounting for demographics and instructor. Significant relationships ( $p < 0.05$ ) are in bold.*

| Independent variables                                     | Estimates of fixed effects |         |        |              |
|-----------------------------------------------------------|----------------------------|---------|--------|--------------|
|                                                           | Estimate±SE                | df      | t      | p-value      |
| <b>Demographics</b>                                       |                            |         |        |              |
| Gender (Reference: Female)                                |                            |         |        |              |
| Male                                                      | -0.415±0.668               | 974.443 | -0.621 | 0.534        |
| Self-describe                                             | 11.649±9.044               | 971.074 | 1.288  | 0.198        |
| Race/ethnicity (Reference: Non-URM)                       |                            |         |        |              |
| URM                                                       | <b>-2.716±0.895</b>        | 975.494 | -3.034 | <b>0.002</b> |
| Self-describe                                             | -4.434±3.238               | 975.431 | -1.369 | 0.171        |
| Class rank (Reference: First-year)                        |                            |         |        |              |
| Sophomore                                                 | -3.455±2.338               | 974.062 | -1.478 | 0.140        |
| Junior                                                    | -2.690±2.351               | 973.243 | -1.144 | 0.253        |
| Senior                                                    | -2.184±2.398               | 974.590 | -0.911 | 0.363        |
| Postbaccalaureate                                         | -1.703±2.518               | 975.080 | -0.676 | 0.499        |
| Graduate student                                          | 2.247±2.831                | 974.953 | 0.794  | 0.428        |
| Other                                                     | 0.081±4.378                | 975.944 | 0.018  | 0.985        |
| First-generation status (Reference: non first-generation) |                            |         |        |              |
| First-generation                                          | -3.385±0.639               | 977.318 | 1.237  | 0.216        |
| Language (Reference: English)                             |                            |         |        |              |
| Non-English                                               | <b>1.243±1.005</b>         | 978.780 | -6.110 | <b>0.000</b> |
| Career (Reference: Life sciences)                         |                            |         |        |              |
| Non-Life sciences                                         | <b>-4.312±0.706</b>        | 978.780 | -6.110 | <b>0.000</b> |
| Institution type (Reference: 4-year)                      |                            |         |        |              |
| 2-year                                                    | -4.649±2.675               | 9.866   | -1.738 | 0.113        |
| <b>Barrier category</b>                                   |                            |         |        |              |
| Personal engagement                                       | <b>2.039±0.314</b>         | 976.617 | 6.490  | <b>0.000</b> |

Course performance ~ gender + race/ethnicity + class rank + first-generation status + language + career + institution type + personal engagement. Instructor=random effect

Supplemental table 12: Mixed-effects model investigating the relationship between **learning environment** and course performance, accounting for demographics and instructor. Significant relationships ( $p < 0.05$ ) are in bold.

| Independent variables                                     | Estimates of fixed effects |         |        |              |
|-----------------------------------------------------------|----------------------------|---------|--------|--------------|
|                                                           | Estimate±SE                | df      | t      | p-value      |
| <b>Demographics</b>                                       |                            |         |        |              |
| Gender (Reference: Female)                                |                            |         |        |              |
| Male                                                      | -0.626±0.681               | 974.923 | -0.918 | 0.359        |
| Self-describe                                             | 9.797±9.236                | 971.156 | 1.061  | 0.289        |
| Race/ethnicity (Reference: Non-URM)                       |                            |         |        |              |
| URM                                                       | <b>-2.442±0.914</b>        | 975.704 | -2.672 | <b>0.008</b> |
| Self-describe                                             | -4.115±3.307               | 975.768 | -1.244 | 0.214        |
| Class rank (Reference: First-year)                        |                            |         |        |              |
| Sophomore                                                 | -3.359±2.387               | 974.335 | -1.407 | 0.160        |
| Junior                                                    | -2.777±2.400               | 973.462 | -1.157 | 0.248        |
| Senior                                                    | -2.415±2.449               | 974.830 | -0.986 | 0.324        |
| Postbaccalaureate                                         | -1.987±2.570               | 975.394 | -0.773 | 0.440        |
| Graduate student                                          | 2.212±2.892                | 975.182 | 0.765  | 0.445        |
| Other                                                     | 1.135±4.467                | 976.297 | 0.254  | 0.800        |
| First-generation status (Reference: non first-generation) |                            |         |        |              |
| First-generation                                          | -3.695±0.651               | 977.756 | 0.776  | 0.438        |
| Language (Reference: English)                             |                            |         |        |              |
| Non-English                                               | <b>0.794±1.023</b>         | 978.393 | -6.289 | <b>0.000</b> |
| Career (Reference: Life sciences)                         |                            |         |        |              |
| Non-Life sciences                                         | <b>-4.524±0.719</b>        | 978.393 | -6.289 | <b>0.000</b> |
| Institution type (Reference: 4-year)                      |                            |         |        |              |
| 2-year                                                    | -4.483±2.611               | 9.940   | -1.717 | 0.117        |
| <b>Barrier category</b>                                   |                            |         |        |              |
| Learning environment                                      | 0.315±0.266                | 973.959 | 1.183  | 0.237        |

Course performance ~ gender + race/ethnicity + class rank + first-generation status + language + career + institution type + learning environment. Instructor=random effect

*Supplemental table 13: Mixed-effects model investigating the relationship between number of categories reported with sufficient access and course performance, accounting for demographics and instructor. Significant relationships ( $p < 0.05$ ) are in bold.*

| Independent variables                                     | Estimates of fixed effects         |
|-----------------------------------------------------------|------------------------------------|
|                                                           | Estimate $\pm$ SE                  |
| Gender (Reference: Female)                                |                                    |
| Male                                                      | -0.618 $\pm$ 0.681                 |
| Self-describe                                             | 9.886 $\pm$ 9.251                  |
| Race/ethnicity (Reference: Non-URM)                       |                                    |
| URM                                                       | <b>-2.406<math>\pm</math>0.913</b> |
| Self-describe                                             | -4.100 $\pm$ 3.309                 |
| Class rank (Reference: First-year)                        |                                    |
| Sophomore                                                 | -3.383 $\pm$ 2.390                 |
| Junior                                                    | -2.799 $\pm$ 2.401                 |
| Senior                                                    | -2.439 $\pm$ 2.450                 |
| Postbaccalaureate                                         | -2.042 $\pm$ 2.571                 |
| Graduate student                                          | 2.273 $\pm$ 2.891                  |
| Other                                                     | 1.181 $\pm$ 4.469                  |
| First-generation status (Reference: non-first-generation) |                                    |
| First-generation                                          | <b>-3.682<math>\pm</math>0.651</b> |
| Language (Reference: English)                             |                                    |
| Non-English                                               | 0.816 $\pm$ 1.025                  |
| Career (Reference: Life sciences)                         |                                    |
| Non-Life sciences                                         | <b>-4.512<math>\pm</math>0.720</b> |
| Institution type (Reference: 4-year)                      |                                    |
| 2-year                                                    | -4.407 $\pm$ 2.589                 |
| Number of categories reported with sufficient access      | 0.327 $\pm$ 0.354                  |

Course performance  $\sim$  gender + race/ethnicity + class rank + first-generation status + language + career + institution type + number of categories reported with sufficient access.

Instructor=random effect



*Supplemental table 14: Prompt 2 responses by institution type*

| Type of suggestion                              | Institution type                 |                     |
|-------------------------------------------------|----------------------------------|---------------------|
|                                                 | 2-year (% , N <sup>a</sup> =259) | 4-year (% , N=1003) |
| Scheduling logistics                            | 4.6                              | 5.6                 |
| FA format                                       | 3.9                              | 4.4                 |
| Consistent communication with students          | 4.6                              | 3.1                 |
| Devices, internet, or other technical resources | 3.1                              | 2.7                 |
| Course delivery                                 | 2.3                              | 5.1                 |
| Requirements/instructions                       | 1.5                              | 2.7                 |
| FA content                                      | 0.0                              | 2.0                 |
| Way to contact/meet other students              | 1.5                              | 1.8                 |
| Friendliness/approachability                    | 1.2                              | 1.5                 |
| Provide guidance/study tips                     | 2.3                              | 0.8                 |
| Create study groups                             | 0.4                              | 2.2                 |
| Peer interaction/group activities               | 1.9                              | 2.4                 |
| Feedback                                        | 0.4                              | 1.1                 |
| FA alignment with lecture                       | 0.4                              | 1.0                 |
| Grading criteria                                | 1.9                              | 1.0                 |
| Flexibility/understanding                       | 1.2                              | 0.5                 |
| Materials                                       | 0.8                              | 0.6                 |
| Instruction content                             | 0.8                              | 0.9                 |
| Study environment                               | 0.8                              | 0.5                 |
| Encourage collaboration                         | 0.8                              | 0.9                 |
| Office hours                                    | 0.4                              | 0.6                 |
| Instructor knowledge                            | 0.4                              | 0.1                 |
| Course pace                                     | 0.4                              | 0.3                 |
| Support for underrepresented students           | 0.0                              | 0.1                 |

<sup>a</sup>N=Number of student responses

Supplemental table 15: Prompt 2 responses by instructor (%)

| Type of suggestion                              | Instructor <sup>a</sup> |            |            |           |            |           |           |           |           |            |             |
|-------------------------------------------------|-------------------------|------------|------------|-----------|------------|-----------|-----------|-----------|-----------|------------|-------------|
|                                                 | 1<br>(156)              | 2<br>(242) | 3<br>(179) | 4<br>(43) | 5<br>(119) | 6<br>(25) | 7<br>(85) | 8<br>(49) | 9<br>(13) | 10<br>(18) | 11<br>(307) |
| Scheduling logistics                            | 3.8                     | 5.8        | 6.1        | 0.0       | 4.2        | 4.0       | 2.4       | 6.1       | 15.4      | 11.1       | 6.5         |
| FA format                                       | 4.5                     | 4.1        | 4.5        | 0.0       | 1.7        | 4.0       | 5.9       | 4.1       | 0.0       | 0.0        | 5.5         |
| Consistent communication with students          | 3.2                     | 2.1        | 1.7        | 4.7       | 4.2        | 4.0       | 4.9       | 2.0       | 0.0       | 5.6        | 4.2         |
| Devices, internet, or other technical resources | 1.3                     | 3.7        | 4.5        | 4.7       | 2.5        | 0.0       | 2.4       | 2.0       | 15.4      | 0.0        | 1.6         |
| Course delivery                                 | 7.1                     | 5.0        | 2.8        | 2.3       | 6.7        | 4.0       | 1.2       | 6.1       | 0.0       | 0.0        | 4.9         |
| Requirements/instructions                       | 1.9                     | 1.7        | 5.0        | 0.0       | 4.2        | 4.0       | 2.4       | 6.1       | 15.4      | 11.1       | 6.5         |
| FA content                                      | 0.0                     | 1.7        | 0.0        | 0.0       | 2.5        | 0.0       | 0.0       | 0.0       | 0.0       | 0.0        | 4.2         |
| Way to contact/meet other students              | 1.3                     | 2.9        | 2.2        | 4.7       | 2.5        | 0.0       | 1.2       | 0.0       | 0.0       | 0.0        | 1.0         |
| Friendliness/approachability                    | 1.9                     | 1.2        | 1.1        | 2.3       | 3.4        | 0.0       | 1.2       | 0.0       | 0.0       | 0.0        | 1.0         |
| Provide general guidance/study tips             | 0.0                     | 0.8        | 0.6        | 0.0       | 0.8        | 0.0       | 3.5       | 2.0       | 0.0       | 0.0        | 1.3         |
| Create study groups                             | 4.5                     | 1.7        | 5.0        | 0.0       | 0.0        | 4.0       | 0.0       | 0.0       | 0.0       | 0.0        | 0.7         |
| Peer interaction/group activities               | 2.6                     | 2.9        | 2.8        | 0.0       | 2.5        | 4.0       | 1.2       | 4.1       | 0.0       | 0.0        | 1.6         |
| Feedback                                        | 0.0                     | 1.2        | 1.1        | 0.0       | 3.4        | 0.0       | 1.2       | 0.0       | 0.0       | 0.0        | 1           |
| FA alignment with lecture                       | 1.9                     | 1.7        | 0.6        | 0.0       | 0.0        | 0.0       | 0.0       | 0.0       | 0.0       | 0.0        | 0.7         |
| Grading criteria                                | 0.0                     | 0.8        | 0.6        | 2.3       | 0.0        | 4.0       | 0.0       | 4.1       | 7.7       | 0.0        | 2.3         |
| Flexibility/understanding                       | 1.3                     | 0.4        | 0.6        | 2.3       | 0.0        | 4.0       | 0.0       | 0.0       | 0.0       | 5.6        | 0.3         |
| Materials                                       | 0.6                     | 1.2        | 0.6        | 0.0       | 0.0        | 0.0       | 0.0       | 2.0       | 0.0       | 5.6        | 1.3         |
| Instruction content                             | 0.0                     | 0.8        | 0.0        | 0.0       | 2.5        | 0.0       | 1.2       | 0.0       | 0.0       | 5.6        | 1.3         |
| Study environment                               | 1.9                     | 0.0        | 0.6        | 0.0       | 0.0        | 0.0       | 1.2       | 0.0       | 7.7       | 0.0        | 0.3         |
| Encourage collaboration                         | 0.6                     | 0.4        | 0.6        | 0.0       | 0.8        | 4.0       | 0.0       | 2.0       | 0.0       | 0.0        | 1.6         |
| Office hours                                    | 0.0                     | 0.0        | 0.6        | 2.3       | 0.8        | 0.0       | 0.0       | 0.0       | 0.0       | 5.6        | 4.2         |
| Instructor knowledge                            | 0.0                     | 0.4        | 0.0        | 0.0       | 0.0        | 0.0       | 0.0       | 2         | 0.0       | 0.0        | 0.0         |
| Course pace                                     | 0.0                     | 0.4        | 0.0        | 0.0       | 0.8        | 0.0       | 1.2       | 0.0       | 0.0       | 0.0        | 0.3         |
| Support for underrepresented students           | 0.0                     | 0.4        | 0.0        | 0.0       | 0.0        | 0.0       | 0.0       | 0.0       | 0.0       | 0.0        | 0.0         |

<sup>a</sup>Number of student responses for each instructor given in parentheses.
